# Supplementary material for: Lactobacilli and other gastrointestinal microbiota of Peromyscus leucopus, reservoir host for agents of Lyme disease and other zoonoses in North America
Source: PLoS One. 2020 Aug 20;15(8):e0231801. doi: 10.1371/journal.pone.0231801 (PMC7446861; doi:10.1371/journal.pone.0231801)
Supplement: S7 Table — (XLSX) [file pone.0231801.s011.xlsx]

## Sheet: Sheet1
Table S7. Peromyscus leucopus and Mus musculus gut metagenome accession numbers
Animal	Genus	Sex	Source	Reads *	MG-RAST ID
101	Mus	F	Feces	3608408	mgm4832562.3
102	Mus	F	Feces	3704735	mgm4832535.3
103	Mus	F	Feces	3834648	mgm4832547.3
104	Mus	F	Feces	3723690	mgm4832537.3
105	Mus	F	Feces	3663674	mgm4832549.3
118	Mus	F	Feces	3685453	mgm4832540.3
120	Mus	F	Feces	4410238	mgm4832571.3
UF1	Mus	F	Feces	2747121	mgm4832555.3
UF2	Mus	F	Feces	3391366	mgm4832574.3
UF3	Mus	F	Feces	3335892	mgm4832548.3
106	Mus	M	Feces	3581299	mgm4832539.3
107	Mus	M	Feces	3384810	mgm4832541.3
108	Mus	M	Feces	4279562	mgm4832576.3
109	Mus	M	Feces	4030671	mgm4832531.3
115	Mus	M	Feces	4207055	mgm4832544.3
116	Mus	M	Feces	2818304	mgm4832551.3
M2_05	Mus	M	Feces	5743420	mgm4832534.3
UM1	Mus	M	Feces	3817004	mgm4832532.3
UM2	Mus	M	Feces	3529100	mgm4832542.3
UM3	Mus	M	Feces	3237675	mgm4832536.3
22258_A †	Peromyscus	F	Feces	3612490	mgm4832563.3
22258_B †	Peromyscus	F	Feces	4794829	mgm4832557.3
22275	Peromyscus	F	Feces	2012289	mgm4832545.3
22277	Peromyscus	F	Feces	3811160	mgm4832543.3
22278	Peromyscus	F	Feces	2971111	mgm4832564.3
22279	Peromyscus	F	Feces	3818832	mgm4832573.3
22281	Peromyscus	F	Feces	3073964	mgm4832554.3
22282	Peromyscus	F	Feces	3073774	mgm4832567.3
22284_A	Peromyscus	F	Feces	3671921	mgm4832561.3
22284_B	Peromyscus	F	Feces	3685950	mgm4832565.3
22289_A	Peromyscus	F	Feces	4325522	mgm4832556.3
22289_B	Peromyscus	F	Feces	2600312	mgm4832546.3
22292_A	Peromyscus	F	Feces	5271942	mgm4832533.3
22292_B	Peromyscus	F	Feces	3015788	mgm4832566.3
22315	Peromyscus	M	Feces	3070585	mgm4832559.3
22316_A	Peromyscus	M	Feces	3599460	mgm4832578.3
22316_B	Peromyscus	M	Feces	3063899	mgm4832553.3
22319	Peromyscus	M	Feces	3550234	mgm4832558.3
22321	Peromyscus	M	Feces	3196218	mgm4832560.3
22325_A	Peromyscus	M	Feces	3575813	mgm4832570.3
22325_B	Peromyscus	M	Feces	2870365	mgm4832550.3
22327	Peromyscus	M	Feces	3659957	mgm4832575.3
22332	Peromyscus	M	Feces	3510351	mgm4832568.3
22335	Peromyscus	M	Feces	3298514	mgm4832569.3
22339_A	Peromyscus	M	Feces	3653519	mgm4832552.3
22339_B	Peromyscus	M	Feces	3852318	mgm4832577.3
22341	Peromyscus	M	Feces	4464849	mgm4832572.3
22400	Peromyscus	F	Stomach	628680	mgm4864873.3
22393	Peromyscus	F	Stomach	445008	mgm4864874.3
22397	Peromyscus	F	Stomach	316024	mgm4864876.3
22407	Peromyscus	F	Stomach	598104	mgm4864878.3
22396	Peromyscus	F	Stomach	373823	mgm4864880.3
22415	Peromyscus	M	Stomach	583094	mgm4864872.3
22372	Peromyscus	M	Stomach	440925	mgm4864875.3
22416	Peromyscus	M	Stomach	480722	mgm4864877.3
22370	Peromyscus	M	Stomach	513585	mgm4864881.3
* Paired-end 250 nucleotide reads after MG-RAST quality control
† A, B: library and indexing replicate
